# Supplementary material
Source: Research Square preprint supplement (doi:10.21203/rs.3.rs-8944455/v1)
Supplement: Supplementary file 3 [file 98acbdf82d948aad4fe9a856.docx]

**Additional file 6. Fitness classes.**

Fitness classes will be led by two certified instructors. They will offer two types of workouts - EMOM (Every Minute On the Minute) or HIIT (High-Intensity Interval Training) - lasting 45 minutes to 1 hour in a group setting. The exercises will focus on strengthening core muscles and VO2max improvements to enhance physical fitness [1]. Each exercise will be adaptable to different fitness levels, with modifications available to simplify or complexify movements as needed. During the class, the instructors will provide options to either increase or decrease intensity. They will demonstrate the exercises and pay attention to students’ positions, correcting them to ensure the exercises are performed correctly.

**Warm-up.** The warm-up will follow a consistent routine at the start of each class, consisting of five exercises targeting major muscle groups (Table 1).

**The class EMOM (Every Minutes On the Minute).** This workout format involves completing a set number of exercise repetitions within a one-minute interval. The remaining time within that minute serves as a recovery period before beginning the next set at the start of the following minute. For example, if 10 push-ups are completed in 20 seconds, there will be 40 seconds of rest before starting the next exercise.

In the PROMESS-Physical Activity Program, this workout will consist of a set of six exercises (Table 2). This set will be repeated 4 to 5 times, with a one-minute additional break between each set, resulting in a total duration of 24 to 30 minutes.

**The class HIIT (High-Intensity Interval Training).** It is a workout format that involves alternating between short bursts of intense exercise and brief periods of rest or lower-intensity activity. The goal is to challenge the body to work at maximum effort during the high-intensity intervals, followed by a brief recovery period before repeating the cycle. This method helps improve cardiovascular fitness [2].

In the PROMESS-Physical Activity Program, this workout will consist of a set of five exercises, repeated four times (Table 3). Each exercise will be performed for 40 seconds, followed by 20 seconds of rest. An additional one-minute break will be taken between each set. The total duration of the session is 25 minutes.

**Cool-down.** A cool-down will be performed at the end of each session, including balance exercises, stretching, and breathing exercises.

*Table 1. Warm-up exercise*

| **WARM - UP** | |
| --- | --- |
| **Exercise** | **Number of repetitions** |
| Push-up & Squat Combo: 1 push-up followed by 2 squats | 10 |
| Superman | 10 |
| Jumping Jacks | 10 |
| Lunges | 5 per legs |
| Plank | 30 seconds to 1 minute |

*Table 2. The EMOM class*

| **EMOM** | |
| --- | --- |
| **Exercise** | **Number of repetitions** |
| Push-ups | 10 |
| Butterfly | 15 |
| High knees | 15 per knees |
| Glute bridge | 15 |
| Leg raises | 20 |

*Table 3. The HIIT class*

| **HITT** | |
| --- | --- |
| **Exercise** | **Exercise - rest times** (seconds) |
| Lunges | 40” – 20” |
| Push-ups | 40” – 20” |
| Superman | 40” – 20” |
| Jumping Jacks | 40” – 20” |
| Plank | 40” – 20” |

**REFERENCES**

1. Smith JS, Bellissimo GF, Amorim FT. The physiological responses to volume-matched high-intensity functional training protocols with varied time domains. Front Physiol. 2025;15.

2. Wen D, Utesch T, Wu J, Robertson S, Liu J, Hu G, et al. Effects of different protocols of high intensity interval training for VO2max improvements in adults: A meta-analysis of randomised controlled trials. J Sci Med Sport. 2019;22:941–7.

3. Chim HQ, Oude Egbrink MGA, Van Gerven PWM, de Groot RHM, Winkens B, Savelberg HHCM. Academic Schedule and Day-to-Day Variations in Sedentary Behavior and Physical Activity of University Students. Int J Environ Res Public Health. 2020;17:2810.
