# Supplementary material
Source: Research Square preprint supplement (doi:10.21203/rs.3.rs-8944455/v1)
Supplement: Supplementary file 5 [file a2ef79fa69b613d36cedf9c7.docx]

**Additional file 9.** Ethical approval

Dear SCHLATTER Sophie and LOISEL Olivier,

The CUMG Ethics Committee, which met on 4 July 2023, issued a favourable opinion, after revisions, on your research project entitled “**Determining the Influence of an Intervention Based on Sedentary Behavior Reduction and Physical Activity Promotion Among Medical Students**”

Here is the IRB number: 2023-07-04-01.

You may now begin your research work.

Sincerely,

Humbert de Fréminville et Élise Benedini

Kind regards,

**Nathalie GRAS**

***Assistante administrative***

**Collège universitaire de médecine générale (CUMG)**

**Université Claude-Bernard Lyon 1**

8 avenue Rockefeller – 69373 LYON Cedex 08

Bâtiment Rockefeller – 2e étage – Escalier D

( 04 78 77 72 86

**@** dmg.cumg@univ-lyon1.fr

**__________________________________________________________________**

Original French version below

**__________________________________________________________________**

Madame SCHLATTER Sophie,

Monsieur LOISEL Olivier,

Le comité d’éthique du CUMG, qui s’est tenu le 4 juillet 2023, a donné un avis favorable, après modifications, à votre projet de recherche intitulé **« PROMESS – Preventive Remediation for Optimal MEdical StudentS – Intérêt d’un module de gestion d'activité physique sur la qualité de vie et sur les performances académiques des étudiants en médecine : étude randomisée, contrôlée, monocentrique. »**

Voici le n° IRB : **2023-07-04-01**

Vous pouvez dès à présent commencer vos travaux de recherche.

Sincères salutations,

Humbert de Fréminville et Élise Benedini

**Cordialement,**

**Nathalie GRAS**

***Assistante administrative***

**Collège universitaire de médecine générale (CUMG)**

**Université Claude-Bernard Lyon 1**

8 avenue Rockefeller – 69373 LYON Cedex 08

Bâtiment Rockefeller – 2e étage – Escalier D

( 04 78 77 72 86

**@** dmg.cumg@univ-lyon1.fr
