# Supplementary material
Source: Research Square preprint supplement (doi:10.21203/rs.3.rs-8944455/v1)
Supplement: Supplementary file 6 [file a3df0b0f41e22cf9f091ee0e.docx]

**Additional file 5. List of PROMESS-Physical Activity advice**

During the session, the PROMESS-Physical Activity expert will give specific advice and goals to the student based on this predefined list. This list is based on well-established physical activity interventions and sedentary behavior reduction, and/or knowledge in the field. To ensure it fits to the specific needs of medical students, the list was previously validated by a sample of medical students and faculty staff working in the health department during a prior workshop (Métais et al. 2025[[1]](#footnote-1)).

| **Advice** | **References** |
| --- | --- |
| Complete a sedentary behavior and physical activity diary | [1] |
| Wear a pedometer and check the number of daily steps | [2, 3] |
| Increase walking and cycling | [4, 5] |
| Increase the number of daily steps | [1, 6] |
| Take the stairs more often | [7] |
| Participate in a physical fitness lesson | [8] |
| Perform one moderate physical activity session per week | [4] |
| Perform one intense physical activity session per week | [4] |
| Gradually increase the duration of your sports activity sessions | [9, 10] |
| Breaking up sedentary work (revisions, internship) | [2, 4, 11, 12] |
| Breaking up sedentary lifestyle free time (screen, sitting time, other) | [2, 4, 11] |
| Breaking up a sedentary lifestyle by moving around while sitting (metro, bus…) | [2, 4, 11] |
| Read a nutrition documentation | [13] |

| [1] Tully MA, Cupples ME. UNISTEP (university students exercise and physical activity) study: a pilot study of the effects of accumulating 10,000 steps on health and fitness among university students. J Phys Act Health. 2011;8:663–7 |
| --- |
| [2] Compernolle S, DeSmet A, Poppe L, Crombez G, De Bourdeaudhuij I, Cardon G, et al. Effectiveness of interventions using self-monitoring to reduce sedentary behavior in adults: a systematic review and meta-analysis. Int J Behav Nutr Phys Act. 2019;16:63. |
| [3] Peng S, Yuan F, Othman AT, Zhou X, Shen G, Liang J. The Effectiveness of E-Health Interventions Promoting Physical Activity and Reducing Sedentary Behavior in College Students: A Systematic Review and Meta-Analysis of Randomized Controlled Trials. Int J Environ Res Public Health. 2023;20:318. |
| [4] Bull FC, Al-Ansari SS, Biddle S, Borodulin K, Buman MP, Cardon G, et al. World Health Organization 2020 guidelines on physical activity and sedentary behaviour. Br J Sports Med. 2020;54:1451–62. |
| [5] World Health Organization. Global levels of physical inactivity in adults: off track for 2030. 2024. |
| [6] Mura M, Rivoire E, Dehina-Khenniche L, Weiss-Gayet M, Chazaud B, Faes C, et al. Effectiveness of an individualized home-based physical activity program in surgery-free non-endarterectomized asymptomatic stroke patients: a study protocol for the PACAPh interventional randomized trial. Trials. 2022;23:145. |
| [7] Daou M, Lohse KR, Miller MW. To Take the Stairs or Not to Take the Stairs? Employing the Reflective−Impulsive Model to Predict Spontaneous Physical Activity. Sports Basel Switz. 2017;5:75. |
| [8] Yorks DM, Frothingham CA, Schuenke MD. Effects of Group Fitness Classes on Stress and Quality of Life of Medical Students. J Am Osteopath Assoc. 2017;117:e17–25. |
| [9] Stassen G, Baulig L, Müller O, Schaller A. Attention to Progression Principles and Variables of Exercise Prescription in Workplace-Related Resistance Training Interventions: A Systematic Review of Controlled Trials. Front Public Health. 2022;10:832523. |
| [10] Robert Bell L, Worn R, William O’Grady M, Denham J, Joseph O’Brien B. Progressive overload in cardiorespiratory exercise training for young and old: Is increasing duration or intensity of exercise more important? Med Hypotheses. 2024;188:111366. |
| [11] Castro O, Vergeer I, Bennie J, Biddle SJH. Feasibility of Reducing and Breaking Up University Students’ Sedentary Behaviour: Pilot Trial and Process Evaluation. Front Psychol. 2021;12:661994. |
| [12] Dutta N, Koepp GA, Stovitz SD, Levine JA, Pereira MA. Using sit-stand workstations to decrease sedentary time in office workers: a randomized crossover trial. Int J Environ Res Public Health. 2014;11:6653–65. |
| [13] Plotnikoff RC, Costigan SA, Williams RL, Hutchesson MJ, Kennedy SG, Robards SL, et al. Effectiveness of interventions targeting physical activity, nutrition and healthy weight for university and college students: a systematic review and meta-analysis. Int J Behav Nutr Phys Act. 2015;12:45. |

1. Métais A, Besnard L, Valero B, Henry A, Schott A-M, Rode G, et al. Addressing medical students’ health challenges: codesign and pilot testing of the Preventive Remediation for Optimal MEdical StudentS (PROMESS) program. BMC Med Educ. 2025;25:812 [↑](#footnote-ref-1)
