# Supplementary material
Source: Research Square preprint supplement (doi:10.21203/rs.3.rs-8944455/v1)
Supplement: Supplementary file 7 [file b6c090d3b9bd01e5b7d80770.docx]

**Additional file 4. Set of articles**

To become a PROMESS-Physical Activity expert, individuals that will conduct the session should have read at least the following articles. The main findings from these articles are summarized in the table below:

| **References** | **Summary** |
| --- | --- |
| Castro et al. (2023)  **How Sedentary Are University Students? A Systematic Review and Meta-Analysis**  Prev Sci.  10.1007/s11121-020-01093-8. | Accumulating high volumes of sedentary behaviour is a risk factor for multiple negative health-related outcomes. The objective of this review was to synthesise the evidence on the levels of sedentary behaviour in university students. Screened records from 13 databases were included if (i) published after 2007 and (ii) reported on university students' amount of total or domain-specific sedentary behaviour. Sub-group and meta-regression analyses were conducted to investigate potential sources of heterogeneity (moderators). A total of 125 studies met the inclusion criteria. Most studies were cross-sectional (84%) and reported screen time (61%) or total sedentary time (39%). Self-reported data indicated that university students spend 7.29 h per day being sedentary. The levels of total sedentary behaviour were significantly higher when measured with accelerometers (M = 9.82 h per day). Computer use presented significantly higher prevalence over other modalities of screen time. Among the explored factors (i.e. countries' income, age, gender, and study's publication date), only publication date significantly moderated sedentary behaviour. Results suggest that a considerable proportion of university students (i) engage in higher levels of sedentary time compared to the general young adult population and (ii) accumulate levels of sedentary time that have been associated with an increased risk for detrimental health outcomes. In addition, meta-regression analyses suggest that sedentary time has increased over the last 10-year period among university students. These findings may inform future initiatives and policies targeting university students' sedentary behaviour. Further research is needed to identify the factors moderating sedentary behaviour in the university setting. |
| Chim et al. (2020)  **Academic Schedule and Day-to-Day Variations in Sedentary Behavior and Physical Activity of University Students.**  Int J Environ Res Public Health  <https://doi.org/10.3390/ijerph17082810> | Students starting at university tend to adopt unhealthy behaviors. With students expected to sit during classes, their academic schedule may be responsible for their activity patterns. The aim of the current study was to investigate the relationship between university students’ academic schedule and day-to-day variations in sedentary behavior (SB) and physical activity (PA). The activity of 317 first-year undergraduate students (mean age 19.6 ± 1.4 years, 69.4% female, 30.0% male, and 0.6% other) was measured with the activPAL3™ triaxial monitor for seven consecutive days. Each class hour was found to be associated with 9.0 additional minutes of SB (95% CI [4.9, 13.1]), 54 additional seconds of moderate-to-vigorous PA (MVPA; 95% CI [12, 96]), and 12.2 min less time in bed (95% CI [−16.6, −7.8]). Active SB ratio (total duration of SB bouts < 30 min divided by total SB duration) decreased by 0.011 per hour of class scheduled for the students (95% CI [−0.016, −0.006]). Light PA (LPA) was not significantly associated with class duration. Students tend to cycle more on days with classes. Seated transportation was not significantly related to whether the students had classes or not. Overall, the academic schedule is associated with SB and PA in students. |
| Genin et al. (2019)  **Promoting Physical Activity and Reducing Sedentary Time Among Tertiary Workers: Position Stand From the French National ONAPS.**  <https://doi.org/10.1123/jpah.2019-0154> | The modernization of our societies has resulted in a steady increase in service industry occupations (tertiarization), which have favored increased sedentary time, while reducing occupational physical activity. In less than 50 years, the United States has increased sedentary professions by about 20%, with a parallel decline in professions requiring physical labor.1 At the same time, French workers spend approximately 10 hours per day sitting without active breaks on work days and about 7.6 hours per day sitting on nonworking days.2 Due to the amount of time that people spend at work, the workplace is now recognized as an opportune setting for promoting an active lifestyle and for developing strategies to reduce sedentary time.3 Although there has been a growing body of literature proposing such strategies over the past 10 years, it is difficult to draw conclusions from this work due to the heterogeneity in research methods and the lack of robust statistical analyses.4,5 Moreover, such workplace intervention strategies appear to suffer from high attrition, as well as a lack of proven sustainability.6,7 Because there is an urgent need to promote physical activity and reduce sedentary time during work time, the French National Conservatory for Physical Activity and Sedentary Behaviors (ONAPS) recently dedicated its annual congress (January 29–30, 2019 in Vichy, France) to this important public health issue. The congress convened an expert panel comprising scientists, public health specialists, occupational physicians, ergonomists, as well as both workers and their employers to examine strategies for improving workplace health. This commentary summarizes the initial conclusions of this expert panel and details the main findings and recommendations regarding the promotion of physical activity and reduction of sedentary time among tertiary employees. |
| Herreros-Irarrázabal et al. (2024)  **Physical activity levels and sedentary behaviour according to sex, age, BMI, academic year, and country among medical students in Latin America**  BMC Public Health  https://doi.org/10.1186/s12889-024-19133-1 | Physical inactivity represents a global challenge in public health, being the second most significant factor contributing to mortality. In Latin America, the prevalence of physical inactivity and sedentary behaviour is notable, affecting medical students as well, who play a crucial role as behavioural role models for the population. This study addresses the prevalence of physical activity and sedentary behaviour among medical students in Latin America during the year 2023. A total of 864 participants from 12 institutions across eight countries were surveyed using the Global Physical Activity Questionnaire. Significant variations in physical activity and sedentary behaviour were observed according to sex, age, body mass index, academic year, and country. Notably, Costa Rica exhibited the highest levels of moderate physical activity in leisure time (90 min/day). Strength training was more common among men (60 min/day) and in Argentina (60 min/day). Sedentary behaviour was higher in women (420 min/day) and during the first academic year (485 min/day). Uruguay stood out with high levels of sedentary behaviour (600 min/day). Correlations indicated positive moderate associations between academic year and moderate leisure-time PA (r:0,128, p:0,007). In conclusion, there are associations between the level of physical activity and sedentary behaviour with the variables studied in this research, with the main findings being that the female sex has more time spent in sedentary behaviour (minutes/day) and less time spent in strength training (minutes/day). Additionally, there are higher levels of sedentary behaviour in the early years of medical study compared to the later years of the program. |
| Gao et al. (2024)  **Occupational Sitting Time, Leisure Physical Activity, and All-Cause and Cardiovascular Disease Mortality**  JAMA Network Open  <https://doi.org/10.1001/jamanetworkopen.2023.50680> | For the first time, the 2020 World Health Organization guidelines on physical activity recommended reducing sedentary behaviors owing to their health consequences. Less is known on the specific association of prolonged occupational sitting with health, especially in the context of low physical activity engagement.To quantify health risks associated with prolonged occupational sitting and to determine whether there is a certain threshold of physical activity that may attenuate it.This prospective cohort study included participants in a health surveillance program in Taiwan who were followed-up between 1996 and 2017. Data on occupational sitting, leisure-time physical activity (LTPA) habits, lifestyle, and metabolic parameters were collected. Data analysis was performed in December 2020.The all-cause and cardiovascular disease (CVD) mortality associated with 3 occupational sitting volumes (mostly sitting, alternating sitting and nonsitting, and mostly nonsitting) were analyzed applying multivariable Cox regression models to calculate the hazard ratios (HRs) for all participants and by subgroups, including 5 LTPA levels and a personal activity intelligence (PAI)–oriented metric. Deaths occurring within the initial 2 years of follow-up were excluded to prevent reverse causality.The total cohort included 481 688 participants (mean [SD] age, 39.3 [12.8] years; 256 077 women [53.2%]). The study recorded 26 257 deaths during a mean (SD) follow-up period of 12.85 (5.67) years. After adjusting for sex, age, education, smoking, drinking, and body mass index, individuals who mostly sat at work had a 16% higher all-cause mortality risk (HR, 1.16; 95% CI, 1.11-1.20) and a 34% increased mortality risk from CVD (HR, 1.34; 95% CI, 1.22-1.46) compared with those who were mostly nonsitting at work. Individuals alternating sitting and nonsitting at work did not experience increased risk of all-cause mortality compared with individuals mostly nonsitting at work (HR, 1.01; 95% CI, 0.97-1.05). For individuals mostly sitting at work and engaging in low (15-29 minutes per day) or no (&lt;15 minutes per day) LTPA, an increase in LTPA by 15 and 30 minutes per day, respectively, was associated with a reduction in mortality to a level similar to that of inactive individuals who mostly do not sit at work. In addition, individuals with a PAI score exceeding 100 experienced a notable reduction in the elevated mortality risk associated with prolonged occupational sitting.As part of modern lifestyles, prolonged occupational sitting is considered normal and has not received due attention, even though its deleterious effect on health outcomes has been demonstrated. In this study, alternating between sitting and nonsitting at work, as well as an extra 15 to 30 minutes per day of LTPA or achieving a PAI score greater than 100, attenuated the harms of prolonged occupational sitting. Emphasizing the associated harms and suggesting workplace system changes may help society to denormalize this common behavior, similar to the process of denormalizing smoking. |
| Goncalves et al. (2023)  **Exploring the Health Effectiveness of a Physical Activity Program Co-Constructed with Students after the COVID-19 Pandemic**  Nutrients  <https://doi.org/10.3390/nu15132913> | Background: University students have low levels of physical activity and high levels of sedentary behaviors that were exacerbated by the COVID-19 pandemic. Even before the pandemic, there was poor uptake of university sports activities. Therefore, it is essential to develop and test innovative programs to increase students’ motivation to engage in physical activity in order to prevent any future deterioration in their general health.  Objective: This exploratory study was conducted to test the effectiveness of a physical activity program that was co-constructed with students.  Methods: First, a workshop drawing on social design methodologies and the fundamentals of physical activity programs was conducted to assess students’ needs and desires in terms of physical activity. Second, the effectiveness of a program co-constructed with students on the basis of this workshop was assessed on physical and mental health parameters. The results showed that the workshop outcomes allowed the physical activity program to be tailored to meet students’ expectations (e.g., session duration and type of activities). This innovative physical activity program was found to improve body image, autonomous motivation, and certain physical parameters. At the end of the 8-week program, the adherence rate was 89%, and 83% of the final respondents expressed a wish to re-enroll for the following semester.  Conclusions: Involving students and considering their wishes, needs, and objectives could facilitate the development of attractive and innovative programs. |
| Leuchter et al. (2022)  **Relationship between exercise intensity and stress levels among U.S. medical students**  Medical Education Online  <https://doi.org/10.1080/10872981.2022.2027651> | Background: Physical activity may protect the mental health of medical students, yet it is unknown which types and intensities of physical activity have the greatest potential to improve medical student well-being.  Objective: We characterize the relationship between exercise intensity and stress levels of U.S. medical students, thereby informing the design of future well-being interventions.  Design: Two cross-sectional validated surveys assessing stress and physical activity were administered one year apart at the David Geffen School of Medicine at UCLA. A total of 1,046 out of 1,392 medical students responded (75%). An ordered logistic regression was used to determine the association between stress and each level of exercise intensity (inactivity, moderate-activity, and health-enhancing physical activity [HEPA]). These exercise intensity groupings were compared to the CDC guidelines for aerobic exercise.  Results: While achieving either moderate-activity or HEPA is compliant with the CDC guidelines for aerobic exercise, the additional intensity of exercise required to achieve HEPA was associated with a 26% increase in the probability of being in the lowest stress quartile and a 22% decrease in the probability of being in the highest stress quartile. Medical student physical activity levels were on-par with the national average per the CDC exercise guidelines (65% vs. 58%), but medical student HEPA levels were significantly lower than the national average (27% vs. 64%; OR 0.21; 95% CI 0.12–0.37).  Conclusions: There is a large disparity in rates of the highest intensity physical activity (HEPA) between medical students and the age-adjusted national average, which has previously been overlooked by the binary CDC exercise guidelines. The fact that HEPA levels are not optimized and more strongly associated with lower stress levels relative to less intense forms of exercise makes it a promising new target for future well-being interventions among medical trainees. |
| Thorndike et al. (2014)  **Activity monitor intervention to promote physical activity of physicians-in-training: randomized controlled trial**  PLoS One  <https://doi.org/10.1371/journal.pone.0100251> | Background: Physicians are expected to serve as role models for healthy lifestyles, but long work hours reduce time for healthy behaviors. A hospital-based physical activity intervention could improve physician health and increase counseling about exercise.  Methods: We conducted a two-phase intervention among 104 medical residents at a large hospital in Boston, Massachusetts. Phase 1 was a 6-week randomized controlled trial comparing daily steps of residents assigned to an activity monitor displaying feedback about steps and energy consumed (intervention) or to a blinded monitor (control). Phase 2 immediately followed and was a 6-week non-randomized team steps competition in which all participants wore monitors with feedback. Phase 1 outcomes were: 1) median steps/day and 2) proportion of days activity monitor worn. The Phase 2 outcome was mean steps/day on days monitor worn (≥500 steps/day). Physiologic measurements were collected at baseline and study end. Median steps/day were compared using Wilcoxon rank-sum tests. Mean steps were compared using repeated measures regression analyses.  Results: In Phase 1, intervention and control groups had similar activity (6369 vs. 6063 steps/day, p = 0.16) and compliance with wearing the monitor (77% vs. 77% of days, p = 0.73). In Phase 2 (team competition), residents recorded more steps/day than during Phase 1 (Control: 7,971 vs. 7,567, p = 0.002; Intervention: 7,832 vs. 7,739, p = 0.13). Mean compliance with wearing the activity monitor decreased for both groups during Phase 2 compared to Phase 1 (60% vs. 77%, p<0.001). Mean systolic blood pressure decreased (p = 0.004) and HDL cholesterol increased (p<0.001) among all participants at end of study compared to baseline.  Conclusions: Although the activity monitor intervention did not have a major impact on activity or health, the high participation rates of busy residents and modest changes in steps, blood pressure, and HDL suggest that more intensive hospital-based wellness programs have potential for promoting healthier lifestyles among physicians. |
| Stephens et al. (2015)  **Physical Fitness and Academic Performance: A Pilot Investigation**  **in USU Medical Students**  Military Medicine  <https://doi.org/10.7205/MILMED-D-14-00559> | This study examined the correlations between physical fitness parameters and standard measures of academic performance in a cohort of students at the Uniformed Services University. Significant positive correlations were noted between the average aerobic fitness score and preclerkship grade point average (GPA; r = 0.37, p < 0.05) and cumulative GPA (r = 0.38, p < 0.05). Positive correlations were also noted between the average overall fitness score and preclerkship GPA (r = 0.34, p < 0.05), medical school cumulative GPA (r = 0.34, p < 0.05), and the score on Step 1 of the national board examination (r = −0.33, p < 0.05). Physical fitness may serve as one indicator to predict which students will succeed in medical school and to identify those who are at risk for poor performance and might benefit from a wellness intervention. |
| Li et al. (2022)  **Associations between body composition and physical fitness among Chinese medical students: a cross-sectional study**  BMC Public Health  <https://doi.org/10.1186/s12889-022-14548-0> | Background: This study examined associations between body composition and physical fitness scores among medical students in Shenyang, China.  Methods: A total of 2291 medical students aged 18–20 (815 male and 1476 female) in Shenyang of China were recruited to participate in the research in May 2019. With the use of the BCA-1B body composition analyzer and standard method of physical fitness assessment, the body composition and seven measures of physical fitness (body mass index, vital capacity, sit and reach, standing long jump, pull-ups/crunches, 50-m sprint, and 800/1000-m run) of college students were measured, respectively. The associations between body composition and physical fitness scores were assessed using multiple linear regression analysis.  Results: The height, weight, total body water, protein mass, mineral content, body mass index, vital capacity, and body function scores of male students were significantly higher than those of female students. However, fat mass (FM), body shape score, physical quality score, and total physical fitness score of female students were significantly higher than those of male students. The results of the multiple linear regression analysis indicated that in male students, only FM was negatively associated with body shape score, body function score, physical quality score, and total physical fitness score. In female students, FM was associated with lower body shape scores, physical quality scores, and total physical fitness scores. Furthermore, the ratio of overweight to obesity in male students was significantly higher than that in female students.  Conclusions: In Chinese medical colleges, the physical fitness level of female students is better than that of male students, and a higher FM was significantly associated with worse physical fitness of medical students. Moreover, male students with a higher rate of overweight and obesity are an important group that needs weight control. |
| Taylor et al. (2022)  **Physical activity, burnout and quality of life in medical students: A systematic review**  Clin Teach  <https://doi.org/10.1111/tct.13525> | Background: Medical students are at risk of burnout and reduced quality of life (QoL). The risk of burnout doubles from third to sixth year of medical school, and medical students have an 8%–11% lower QoL than nonmedical students. It is imperative to prevent this, as burnout and reduced QoL is independently associated with errors in practice. This systematic review aims to examine whether physical activity/ exercise is associated with burnout and/or QoL in medical students.  Methods: Articles were identified through database searches of Embase, Medline, PsycINFO, Scopus and Web of Science. Studies were included if both physical activity/exercise and burnout or QoL were measured and limited to those focusing on medical students. Risk of bias was assessed using accredited cohort and crosssectional checklists. A narrative synthesis was conducted due to heterogeneity in the dataset.  Findings: Eighteen studies were included, comprising 11,500 medical students across 13 countries. Physical activity was negatively associated with burnout and positively associated with QoL. Furthermore, the findings were suggestive of a dose–response effect of physical activity on both burnout and QoL; higher intensities and frequencies precipitated greater improvements in outcomes.  Conclusions: This multinational review demonstrates that physical activity is associated with reduced burnout and improved QoL in medical students. It also identifies a paucity of research into the optimal intensity, frequency, volume and mode of physical activity. Further research, building on this review, is likely to inform the long overdue development of evidence-based, well-being curricula. This could involve incorporating physical activity into medical education which may improve well-being and better prepare students for the demands of medical practice. |
| Plotnikoff et al. (2015)  **Effectiveness of interventions targeting physical activity, nutrition and healthy weight for university and college students: a systematic review and meta-analysis.**  Int J Behav Nutr Phys Act  <https://doi.org/10.1186/s12966-015-0203-7> | To examine the effectiveness of interventions aimed at improving physical activity, diet, and/or weight-related behaviors amongst university/college students. Five online databases were searched (January 1970 to April 2014). Experimental study designs were eligible for inclusion. Data extraction was performed by one reviewer using a standardized form developed by the researchers and checked by a second reviewer. Data were described in a narrative synthesis and meta-analyses were conducted when appropriate. Study quality was also established. Forty-one studies were included; of these, 34 reported significant improvements in one of the key outcomes. Of the studies examining physical activity 18/29 yielded significant results, with meta-analysis demonstrating significant increases in moderate physical activity in intervention groups compared to control. Of the studies examining nutrition, 12/24 reported significantly improved outcomes; only 4/12 assessing weight loss outcomes found significant weight reduction. This appears to be the first systematic review of physical activity, diet and weight loss interventions targeting university and college students. Tertiary institutions are appropriate settings for implementing and evaluating lifestyle interventions, however more research is needed to improve such strategies. |
| Wu et al. (2023)  **The Association between Academic Schedule and Physical Activity Behaviors in University Students**  Int J Environ Res Public Health  <https://doi.org/10.3390/ijerph20021572> | Background: University students sit too much, which is detrimental to their physical and mental health. Academic schedules, including scheduled education time and self-study time, may influence their physical activity behaviors.  Objectives: To investigate (1) the association between scheduled education time and students' physical activity levels during weekdays; (2) the association between self-study time and students' physical activity levels during the weekdays and weekends.  Methods: 126 (68 Maastricht University (UM); 58 KU Leuven (KUL)) first-year undergraduate students in biomedical sciences (mean ± SD age: 19.3 ± 1.0, BMI: 22.0 ± 3.0, 17% men, 83% women) completed a demographics questionnaire and reported their academic activities with a 7-day logbook. Furthermore, their physical activity behavior was measured with the activPAL monitor for 7 days. Linear mixed models were used to examine the associations between university (UM versus KUL), academic activities (scheduled education time and self-study time), and students' activity levels.  Results: During weekdays, each hour of scheduled education time per day was significantly associated with a 1.3 min decrease of moderate to vigorous physical activity (MVPA) per day. Scheduled education time was not significantly associated with the sedentary time, light-intensity physical activity (LPA), and active sedentary behavior ratio. Each hour of self-study per day was significantly associated with 8 min more of sedentary time per day, 6 min less LPA per day, and 1.3 min less MVPA per day. Self-study time was not significantly associated with active sedentary behavior ratio. During the weekend, each hour of self-study time per day was associated with an additional 17.8 min of sedentary time per day and a reduction of 15.2 min of LPA per day. Self-study time was not significantly associated with the time spent doing MVPA and active sedentary behavior ratio.  Conclusions: It could be more effective to change students' physical activity behaviors during self-study than during scheduled education time. Therefore, offering a study environment that reduces sedentary behavior and promotes light-intensity physical activity, is crucial.  Keywords: higher education; physical activity; scheduled education time; sedentary behavior; self-study time. |
