# Supplementary material
Source: Research Square preprint supplement (doi:10.21203/rs.3.rs-8944455/v1)
Supplement: Supplementary file 8 [file cbc54e1c804b7c7d56efafde.docx]

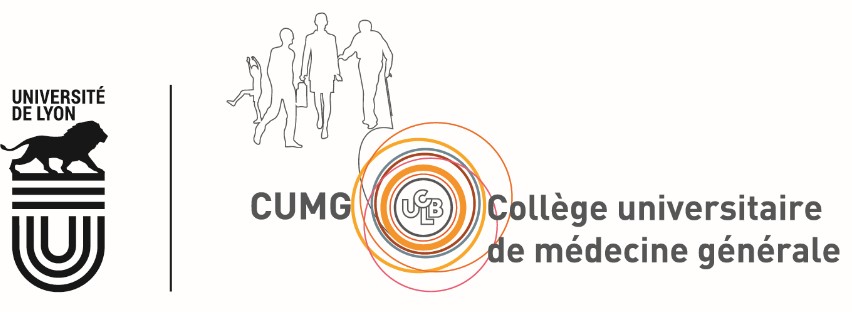


COMITÉ D’ÉTHIQUE DE LA RECHERCHE

**FORMULAIRE DE CONSENTEMENT POUR PARTICIPATION À UNE RECHERCHE**

**TITRE DE LA RECHERCHE :** PROMESS – *Preventive Remediation for Optimal MEdical StudentS* – Intérêt d’un module de gestion d’activité physique sur la qualité de vie et sur les performances académiques des étudiants en médecine : étude randomisée, contrôlée, monocentrique.

Je soussigné.e ………………………………………………………… *(nom et prénom du sujet),* accepte de participer à l’étude PROMESS – *Preventive Remediation for Optimal MEdical StudentS* – Intérêt d’un module de gestion d’activité physique sur la qualité de vie et sur les performances académiques des étudiants en médecine : étude randomisée, contrôlée, monocentrique.

Les objectifs et modalités de l’étude m’ont été clairement expliqués par le Dr Sophie SCHLATTER*.* J’ai lu et compris la fiche d’information qui m’a été remise.

À l’exception des responsables de l’étude, qui traiteront les informations dans le plus strict respect du secret médical, mon anonymat sera préservé.

J’accepte que les données nominatives me concernant recueillies à l’occasion de cette étude puissent faire l’objet d’un traitement automatisé par les organisateurs de la recherche. Je pourrai exercer mon droit d’accès et de rectification auprès du Dr Sophie SCHLATTER*.*

J’ai bien compris que ma participation à l’étude est volontaire.

Je suis libre d’accepter ou de refuser de participer, et je suis libre d’arrêter à tout moment ma participation en cours d’étude. Dans ce dernier cas, je contacte la responsable de l’étude, le Dr Sophie SCHLATTER, tél : XX XX XX XX XX, [promess_sante@univ-lyon1.fr](mailto:promess_sante@univ-lyon1.fr)

Mon consentement ne décharge pas les organisateurs de cette étude de leurs responsabilités. Je conserve tous mes droits garantis par la loi.

Après en avoir discuté et avoir obtenu la réponse à toutes mes questions, j’accepte librement et volontairement de participer à la recherche qui m’est proposée.

Je m’engage à suivre les séances du module avec assiduité.

Fait à ……………………………………………

le ………………………………………

*Nom et signature de l’investigateur Signature du sujet*

Formulaire de consentement pour participation à une recherche dans le domaine de la santé Protocole PROMESS - ACTIVITÉ PHYSIQUE– Version n°2 en date du 11/07/2023
