# Supplementary material
Source: Research Square preprint supplement (doi:10.21203/rs.3.rs-8944455/v1)
Supplement: Supplementary file 9 [file cd713a07f9075dcacfde6885.docx]

**Additional file 7.** Table of secondary outcomes.

**Table 1.** *Secondary outcomes.*

| Methods | Markers | First analysis –interventional arm | Second analysis –both arms (interventional & control) |
| --- | --- | --- | --- |
| VAS | Sedentary behavior | S1, S2, S3 | NA |
| Physical activity | S1, S2, S3 | NA |
| Physical fitness | S1, S2, S3 | NA |
| GPAQ | Scores of physical activity levels | S1, S2, S3 | Pre-intervention, Post-intervention |
| Accelerometry | Sedentary bouts | Pre-intervention, S1-S2, S2-S3 | Pre-intervention, Post-intervention |
| Light Physical Activity | Pre-intervention, S1-S2, S2-S3 | Pre-intervention, Post-intervention |
| Moderate-to-vigorous Physical Activity | Pre-intervention, S1-S2, S2-S3 | Pre-intervention, Post-intervention |
| Steps | Pre-intervention, S1-S2, S2-S3 | Pre-intervention, Post-intervention |
| Critical Dynamic Body Acceleration | Pre-intervention, S1-S2, S2-S3 | Pre-intervention, Post-intervention |
| Body composition | Body Mass Index | S1, S2, S3 | Pre-intervention, Post-intervention |
| Fat mass | S1, S2, S3 | Pre-intervention, Post-intervention |
| Fat-free mass | S1, S2, S3 | Pre-intervention, Post-intervention |
| Skeletal muscle mass | S1, S2, S3 | Pre-intervention, Post-intervention |
| Bone mineral content | S1, S2, S3 | Pre-intervention, Post-intervention |
| Fat-free mass hydration | S1, S2, S3 | Pre-intervention, Post-intervention |
| Phase angle | S1, S2, S3 | Pre-intervention, Post-intervention |
| Impedance ratio | S1, S2, S3 | Pre-intervention, Post-intervention |
| Physical fitness | Maximal isometric strength | NA | Pre-intervention, Post-intervention |
| Maximal power | NA | Pre-intervention, Post-intervention |
| Estimated VO2max | NA | Pre-intervention, Post-intervention |
| Heart Rate Recovery | NA | Pre-intervention, Post-intervention |

GPAQ: Global Physical Activity Questionnaire; S1: session 1; S2: session 2; S3: session 3; S1-S2: between session 1 and 2; S2-S3: between session 2 and 3; VAS; Visual Analog Scale
