# Supplementary material
Source: Research Square preprint supplement (doi:10.21203/rs.3.rs-8944455/v1)
Supplement: Supplementary file 10 [file df2492c97b28fc9bf87f08f8.docx]

**Additional file 8.** SPIRIT checklist.

**Table 1. SPIRIT checklist.**

| **Section / Topic** | **Item No.** | **SPIRIT 2025 item description** | **Reported on page number - Section** |
| --- | --- | --- | --- |
| **Administrative information** | | | |
| Title and structured summary | 1a | Title stating trial design, population, interventions, identified as protocol | p.1 – Title |
| 1b | Structured summary including WHO Trial Registration Data Set | p.2 – Abstract |
| Protocol version | 2 | Protocol version and date | p.7-8 – Methods / Design |
| Roles and responsibilities | 3a | Names, affiliations, and roles of protocol contributors | p.1 – Author list; p.29-30 –Author contributions |
| 3b | Name and contact information for the trial sponsor | p.29 – Declarations / Funding |
| 3c | Role of sponsor and funders | p.29 – Declarations / Funding |
| 3d | Committees and oversight groups | p.7-8 – Methods / Ethics statement; p.23 – Methods / Data management and monitoring |
| **Open science** | | | |
| Trial registration | 4 | Trial registration (registry, ID, URL, date) | p.2 – Abstract; p.8 – Methods / Ethics statement |
| Protocol and statistical analysis plan | 5 | Access to protocol and statistical analysis plan | p.23 – Methods / Availability; p.24-25-26 Methods / Statistical analysis plan |
| Data sharing | 6 | Data sharing (IPD, code, materials) | p.29 – Declarations / Availability of data |
| Funding and conflicts of interest | 7a | Sources of funding | p.29 – Declarations / Funding |
| 7b | Conflicts of interest | p.29 – Declarations / Competing interests |
| Dissemination policy | 8 | Plans to communicate trial results | p.2 – Abstract; p.26 – Methods / Dissemination and open science strategies |
| **Introduction** | | | |
| Background and rationale | 9a | Scientific background and rationale | p.3/5 – Background |
| 9b | Explanation for choice of comparator | p.6 –Methods / Design and settings |
| Objectives | 10 | Specific objectives related to benefits and harms | p8 – Methods / Ethics statement |
| **Methods: Patient and public involvement, trial design** | | | |
| Patient and public involvement | 11 | Patient and public involvement | p.6 – Methods / Design and settings; p.26 – Methods / Dissemination and open science strategies |
| Trial design | 12 | Trial design (type, allocation ratio, framework) | p.6/8 – Methods / Designs and settings |
| **Methods: Participants, interventions, outcomes** | | | |
| Trial setting | 13 | Trial setting | p.6/8 – Methods / Designs and settings |
| Eligibility criteria | 14a | Eligibility criteria for participants | p.6/8 – Methods / Designs and settings |
| 14b | Eligibility criteria for sites and intervention providers | p.6/8 – Methods / Designs and settings |
| Intervention and comparator | 15a | Intervention and comparator description | p.6/7 – Methods / Designs and settings |
| 15b | Criteria for modifying/discontinuing intervention | p.8 – Methods / Ethics statement |
| 15c | Strategies to improve adherence | p.5 – Background  p.13 - Methods / Intervention |
| 15d | Concomitant care | p.6 – Methods / Design and settings |
| Outcomes | 16 | Primary and secondary outcomes (metrics, time points) | p.24-25 – Methods / Data analysis; Additional file 7 |
| Harms | 17 | Harms definition and assessment | p8 – Methods / Ethics statement |
| Participant timeline | 18 | Time schedule of enrollment, interventions (including any run-ins and washouts), assessments, and visits for participants. | p.6/7 – Methods / Designs and settings |
| Sample size | 19 | Sample size calculation | p.25 – Methods / Data analysis / A priori sample size |
| Recruitment | 20 | Recruitment strategies | p.6 – Methods / Design and settings |
| **Methods: Assignment of interventions** | | | |
| Sequence generation | 21a | Sequence generation | p.6 – Methods / Design and settings |
| 21b | Type of randomisation and stratification | p.6 – Methods / Design and settings |
| Allocation concealment mechanism | 22 | Allocation concealment mechanism | p.7 – Methods / Design and settings |
| Implementation | 23 | Implementation (access to allocation sequence) | p.7 – Methods / Design and settings |
| Blinding | 24a | Blinding | p.7 – Methods / Design and settings |
| 24b | Blinding procedure | p.7 – Methods / Design and settings |
| 24c | Unblinding | p.7 – Methods / Design and settings |
| **Methods: Data collection, management, analysis** | | | |
| Data collection methods | 25a | Data collection methods and instruments | p.8/23 – Methods |
| 25b | Participant retention and follow-up | p.7 – Methods / Design and settings |
| Data management | 26 | Plans for data entry, coding, security, and storage | p.23 – Methods / Data management and monitoring |
| Statistical methods | 27a | Statistical methods | p.25/26 – Methods / Statistical analysis plan |
| 27b | Analysis population | p.25/26 – Methods / Statistical analysis plan |
| 27c | Missing data handling | p.24 – Methods / Data analysis |
| 27d | Additional analyses | p.25/26 – Methods / Statistical analysis plan |
| **Methods: Monitoring** | | | |
| Data monitoring committee | 28a | Data monitoring committee | p.23/24 – Methods / Data management and monitoring |
| 28b | Interim analyses and stopping rules | p.24 – Methods / Data management and monitoring |
| Trail monitoring | 29 | Frequency and procedures for monitoring trial conduct | p.23/24 – Methods / Data management and monitoring |
| **Ethics** | | | |
| Research ethics approval | 30 | Research ethics approval | p.29 – Declarations / Ethics approval and consent to participate |
| Protocol amendments | 31 | Protocol amendments | p.8 – Methods / Ethics statement |
| Consent or assent | 32a | Informed consent | p.8 – Methods / Ethics statement |
| 32b | Additional consent for ancillary studies | NA - No ancillary studies are planned; additional consent is not required. |
| Confidentiality | 33 | How personal information about potential and enrolled participants will be collected, shared, and maintained in order to protect confidentiality before, during, and after the trial | p.8 – Methods / Ethics statement |
| Ancillary and post-trial care | 34 | Provisions, if any, for ancillary and post-trial care, and for compensation to those who suffer harm from trial participation | NA - No ancillary or post‑trial care is planned, and no additional provisions are applicable for this study. |
